# Supplementary material for: Neurofilament light is associated with clinical outcome and hemorrhagic transformation in moderate to severe ischemic stroke
Source: PubMed Central journal article supplement — J Cent Nerv Syst Dis. 2023 Jan 4;15:11795735221147212. doi: 10.1177/11795735221147212 (PMC9827527; doi:10.1177/11795735221147212), 2023-01-04
Supplement: sj-pdf-1-cns-10.1177_11795735221147212.pdf [file sj-pdf-1-cns-10.1177_11795735221147212.pdf]

Table A: Summary of included samples characteristic

|                               |                      |
|-------------------------------|----------------------|
|                               |                      |
| N                             | 51                   |
| Age (median;IQR)              | 71 (59, 82)          |
| Gender(Male)                  | 27 (52.9%)           |
| DM(%)                         | 16 (31.4%)           |
| HT(%)                         | 41 (80.4%)           |
| DLP(%)                        | 34 (66.7%)           |
| AF(%)                         | 23 (45.1%)           |
| Smoking(%)                    | 12 (23.5%)           |
| CKD(%)                        | 2 (3.9%)             |
| Drug(%)                       | 2 (3.9%)             |
| IHD(%)                        | 8 (15.7%)            |
| NIHSS admission (median;IQR)  | 12 (6, 27)           |
| NIHSS discharge (median;IQR)  | 7 (0, 28)            |
| NIHSS 3 months (median;IQR)   | 4 (0, 28)            |
| MRS D/C (median;IQR)          | 4 (0, 5)             |
| rtPA(%)                       | 13 (25.5%)           |
| Thrombectomy(%)               | 12 (23.5%)           |
| Subtype(%)                    |                      |
| LAA(%)                        | 15 (29.4%)           |
| Cardioembolic(%)              | 23 (45.1%)           |
| Small Vessel(%)               | 10 (19.6%)           |
| Other determined(%)           | 1 (2%)               |
| ESUS(%)                       | 1 (2%)               |
| Hemorrhagic transformation(%) | 12 (23.5%)           |
| HI1(%)                        | 2 (3.9%)             |
| HI2(%)                        | 2 (3.9%)             |
| PH1(%)                        | 5 (9.8%)             |
| PH2(%)                        | 3 (5.9%)             |
| NFL day 1 (median;IQR)        | 24.85 (13.96, 59.15) |
| NFL day 3(median;IQR)         | 59.63 (32.19, 99.01) |

Figure A: CONSORT diagram

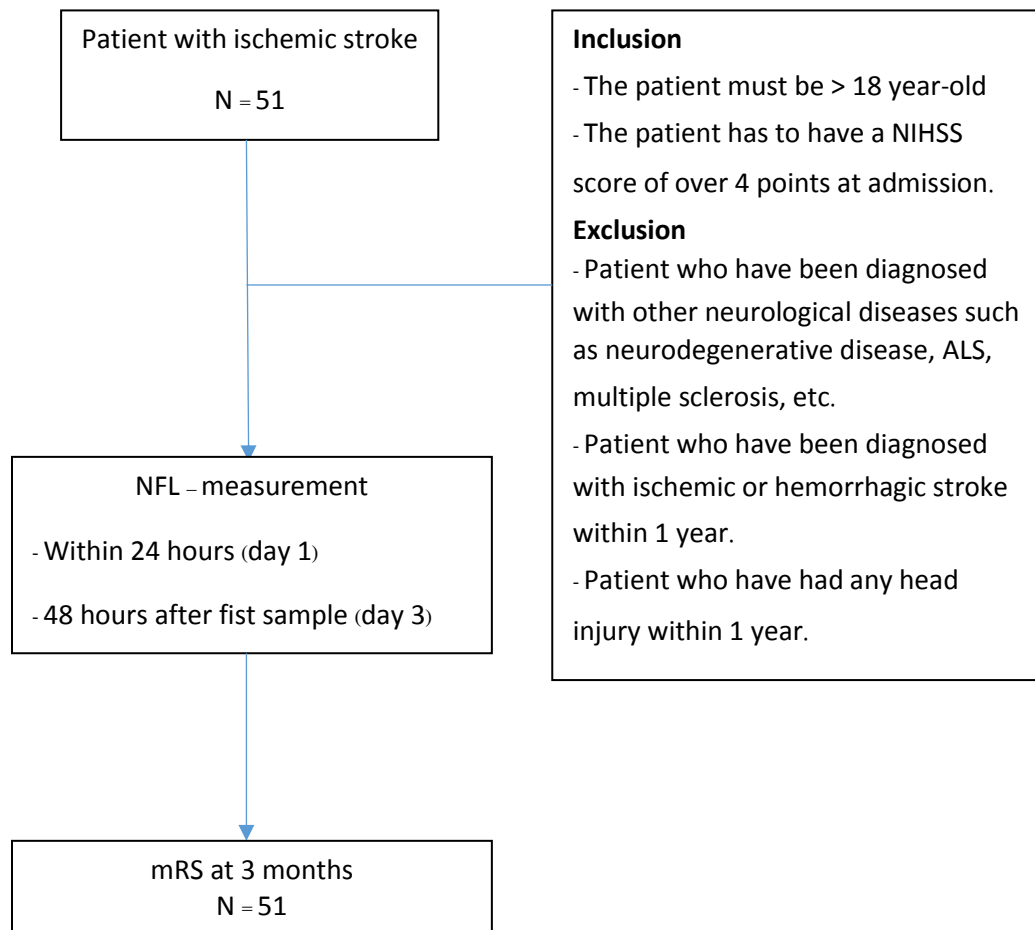

Table B: Correlation between factors and clinical outcome

| MRS > 2               | Correlation Efficient | P value |
|-----------------------|-----------------------|---------|
| Age                   | 0.22                  | 0.121   |
| Gender(Male)          | -0.128                | 0.372   |
| DM                    | 0.197                 | 0.166   |
| HT                    | 0.311                 | 0.026   |
| DLP                   | 0.199                 | 0.162   |
| AF                    | 0.082                 | 0.566   |
| Smoking               | -0.123                | 0.392   |
| CKD                   | 0.162                 | 0.255   |
| Drug                  | -0.045                | 0.756   |
| IHD                   | 0.0115                | 0.916   |
| NIHSS admission       | 0.505                 | < 0.001 |
| NIHSS discharge       | 0.769                 | < 0.001 |
| NIHSS 3 months        | 0.823                 | < 0.001 |
| MRS D/C               | 0.818                 | < 0.001 |
| RtPA                  | -0.175                | 0.219   |
| Thrombectomy          | -0.028                | 0.846   |
| Subtype               |                       |         |
| LAA                   | 0.078                 | 0.588   |
| Cardioembolic         | 0.163                 | 0.253   |
| Small Vessel          | -0.413                | 0.03    |
| Other determined      | 0.114                 | 0.427   |
| ESUS                  | 0.114                 | 0.427   |
| Hemorrhagic transform | 0.067                 | 0.641   |
| HI1                   | -0.045                | 0.756   |
| HI2                   | -0.045                | 0.756   |
| PH1                   | 0.130                 | 0.364   |
| PH2                   | 0.030                 | 0.834   |
| NFL day 1             | 0.191                 | 0.179   |
| NFL day 3             | 0.360                 | 0.009   |
| $\Delta$ NFL          | 0.398                 | 0.004   |

Table C: Univariate logistic regression model

|                        | Odd ratio (95% CI)         | P value      |
|------------------------|----------------------------|--------------|
| NFL day 1              | 1.012 (0.995-1.029)        | 0.159        |
| <b>NFL day 3</b>       | <b>1.019 (1.002-1.037)</b> | <b>0.03</b>  |
| <b>ΔNFL</b>            | <b>1.031 (1.003-1.060)</b> | <b>0.027</b> |
| Age                    | 1.032 (0.988-1.077)        | 0.156        |
| Sex                    | 0.591 (0.190-1.836)        | 0.363        |
| HT                     | 5.026 (1.117-22.613)       | 0.35         |
| DLP                    | 2.352 (0.713-7.755)        | 0.16         |
| AF                     | 1.406 (0.45-4.391)         | 0.557        |
| rtPA                   | 0.446 (0.124-1.603)        | 0.216        |
| Thrombectomy           | 0.842 (0.235-3.264)        | 0.842        |
| <b>NIHSS admission</b> | <b>1.296 (1.102-1.524)</b> | <b>0.002</b> |
